# Supplementary material
Source: HighWire-hosted journal article supplement (http://www.cmaj.ca/highwire/filestream/58939/field_highwire_adjunct_files/3/advice-garland-4-at.pdf)
Supplement: advice-garland-4-at.pdf [file advice-garland-4-at.pdf]

**APPENDIX 4 (as supplied by the authors): Effect of leaving hospital against medical advice in sensitivity analysis regression models of unscheduled hospital readmission within 30 days**

| Model                                       | # persons | # records | Adjusted odds ratio (95% confidence interval) |                      |
|---------------------------------------------|-----------|-----------|-----------------------------------------------|----------------------|
|                                             |           |           | Between-person effect                         | Within-person effect |
| Base <sup>a</sup>                           | 610,187   | 1,916,104 | 3.04 (2.79, 3.30)                             | 2.10 (1.99, 2.21)    |
| Autoregressive GEE correlation <sup>b</sup> | 610,187   | 1,916,104 | 2.61 (2.40, 2.84)                             | 2.08 (1.98, 2.180)   |
| Truncate records <sup>c</sup>               | 610,187   | 1,852,097 | 3.34 (3.14, 3.56)                             | 1.97 (1.84, 2.11)    |
| Single record per patient <sup>d</sup>      | 610,187   | 610,187   | 2.48 (2.26, 2.71)                             | n.a.                 |

AMA, left hospital against medical advice.

<sup>a</sup> base model: all eligible records, exchangeable GEE correlation coefficient, any AMA discharges in prior 5 years as a covariate

<sup>b</sup> autoregressive model: all eligible records, AR1 GEE correlation coefficient, any AMA discharges in prior 5 years as a covariate

<sup>c</sup> truncated records model: truncate each individual's included index hospitalizations after the first AMA occurrence, exchangeable GEE correlation coefficient, any AMA discharges in prior 5 years *not* a covariate

<sup>d</sup> single record per patient model: uses a single randomly chosen index hospitalization per patient, not a GEE model, any AMA discharges in prior 5 years as a covariate
